# Supplementary material for: An efficient Cd two-stage column system for high-precision determination of Cd isotopic compositions by double spike MC-ICP-MS
Source: Royal Society of Chemistry journal article supplement (doi:10.1039/d3ja00468f), 2024-01-01
Supplement: d3ja00468f1.pdf [file d3ja00468f1.pdf]

**Table S1.** Cd standard and double spike isotope calibrations.

|                                                    | $^{111}\text{Cd}/^{112}\text{Cd}$ | $^{113}\text{Cd}/^{112}\text{Cd}$ | $^{114}\text{Cd}/^{112}\text{Cd}$ |
|----------------------------------------------------|-----------------------------------|-----------------------------------|-----------------------------------|
| NIST3108                                           | 0.53085                           | 0.50713                           | 1.19201                           |
| $^{111}\text{Cd}$ - $^{113}\text{Cd}$ double spike | 26.33282                          | 15.88095                          | 0.36050                           |

The Cd standard and the  $^{111}\text{Cd}$ - $^{113}\text{Cd}$  double spike calibrations were measured on MC-ICP-MS (Neptune Plus).<sup>22</sup> The Cd isotopic compositions of NIST3108 were normalized to  $^{114}\text{Cd}/^{112}\text{Cd} = 1.19201$  following the exponential law for the instrument mass fractionation.<sup>9</sup>
